# Supplementary material for: Strong halogen bonding of 1,2-diiodoperfluoroethane and 1,6-diiodoperfluorohexane with halide anions revealed by UV-Vis, FT-IR, NMR spectroscopes and crystallography
Source: Royal Society of Chemistry journal article supplement (doi:10.1039/c1cp20522f), 2011-01-01
Supplement: c1cp20522f.pdf [file c1cp20522f.pdf]

# Strong Halogen Bonding of 1,2-Diodoperfluoroethane and 1,6-Diodoperfluorohexane with Halide Anions Revealed by UV-Vis, FT-IR, NMR Spectroscopies and Crystallography†

Qian Jin Shen and Wei Jun Jin\*

## Supplementary information

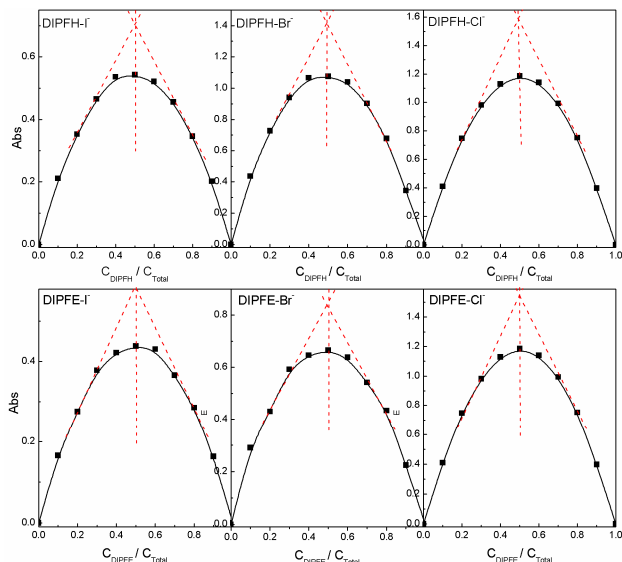

Fig. S1 Job's plots indicated the formation of 1:1 DIPFAlkane...X<sup>-</sup> complexes.

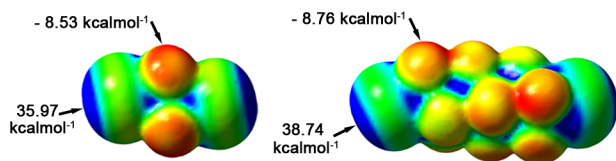

Fig. S2 The computed electrostatic potentials on the surface of DIPFE and DIPFH. (Blue indicates sites of positive charge and red sites of negative charge. Values at the maxima and minima are indicated.)

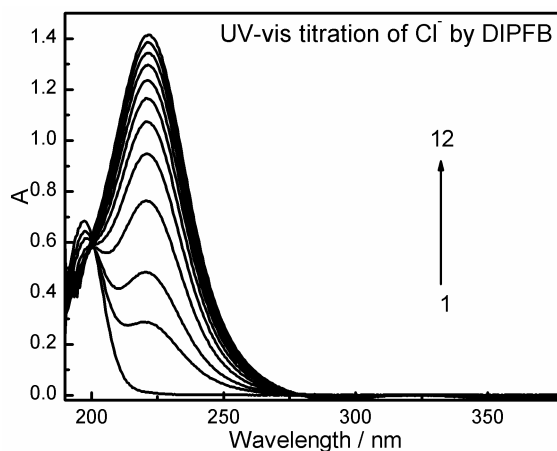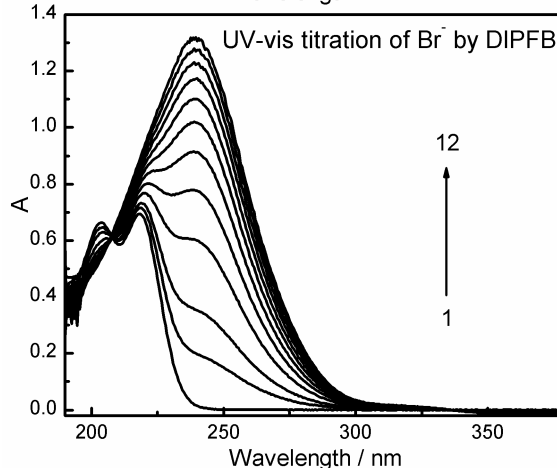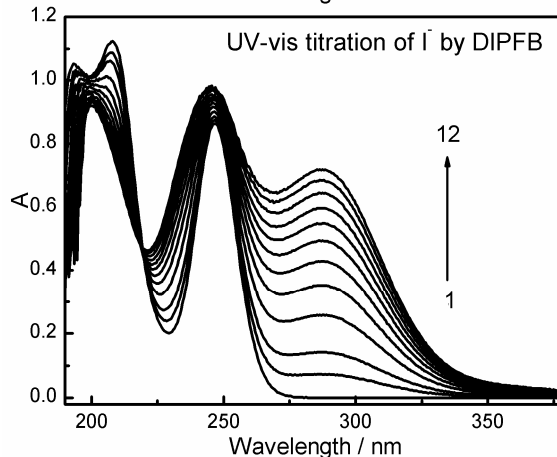

Fig. S3 The subtracted UV titration spectra of 0.5 mM halide anions by diiodoperfluorobutane (DIPFB) in acetonitrile. (From line 1 to 12, [DIPFB] = 0, 1.0, 2.0, 4.0, 6.0, 8.0, 10.0, 12.0, 14.0, 16.0, 18.0, 20.0 mM, respectively.)

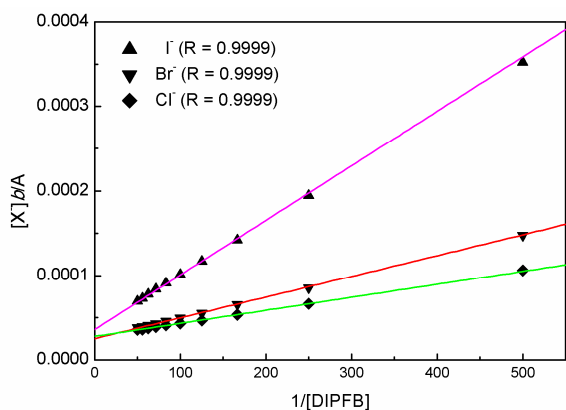

**Fig. S4** Benesi-Hildebrand fitting of [halide] $b/A$  vs  $1/[DIPFB]$ . (R means the correlation coefficient.)

**Table S1** Spectroscopic and energetic characteristics of the  
s  $DIPFB \cdots X^-$  complexes in acetonitrile

|                     | $\lambda/nm$ | $h\nu/eV$ | $\epsilon/10^4 M^{-1} cm^{-1}$ | $K/M^{-1}$       |
|---------------------|--------------|-----------|--------------------------------|------------------|
| DIPFB $\cdots Cl^-$ | 221          | 5.62      | $3.60 \pm 0.01$                | $173.4 \pm 7.3$  |
| DIPFB $\cdots Br^-$ | 242          | 5.12      | $3.43 \pm 0.26$                | $121.9 \pm 18.9$ |
| DIPFB $\cdots I^-$  | 287          | 4.33      | $2.81 \pm 0.05$                | $68.6 \pm 11.9$  |

$\epsilon$  and  $K$  are the average results of triplicated experiments.

**Table S2** Crystal data and structure refinement

| Compound reference                          | DIPFE $\cdots I^-$ | DIPFH $\cdots I^-$ | DIPFE $\cdots Cl^-$ |
|---------------------------------------------|--------------------|--------------------|---------------------|
| Chemical formula                            | C18 H36 F4 I3 N    | C22 H36 F12 I3 N   | C18 H36 Cl F4 I2 N  |
| Formula Mass                                | 723.18             | 923.22             | 631.73              |
| Crystal system                              | Monoclinic         | Trigonal           | Tetragonal          |
| $a/\text{\AA}$                              | 8.2768(11)         | 16.3619(5)         | 15.8925(2)          |
| $b/\text{\AA}$                              | 13.3801(18)        | 16.3619(5)         | 15.8925(2)          |
| $c/\text{\AA}$                              | 23.548(3)          | 21.5050(14)        | 42.2287(11)         |
| $\alpha/^\circ$                             | 90.00              | 90.00              | 90.00               |
| $\beta/^\circ$                              | 94.103(2)          | 90.00              | 90.00               |
| $\gamma/^\circ$                             | 90.00              | 120.00             | 90.00               |
| Unit cell volume/ $\text{\AA}^3$            | 2601.1(6)          | 4985.8(4)          | 10665.8(3)          |
| Temperature/K                               | 150(2)             | 150(2)             | 296(2)              |
| Space group                                 | $P2(1)/n$          | $P3(1)21$          | $I4(1)/acd$         |
| No. of formula units per unit cell, Z4      | 6                  | 16                 | 16                  |
| No. of reflections measured                 | 14252              | 31251              | 31963               |
| No. of independent reflections              | 5892               | 8903               | 3142                |
| $R_{int}$                                   | 0.0197             | 0.0377             | 0.0506              |
| Final $R_i$ values ( $I > 2\sigma(I)$ )     | 0.0244             | 0.1003             | 0.0764              |
| Final $wR(F^2)$ values ( $I > 2\sigma(I)$ ) | 0.0443             | 0.2305             | 0.2503              |
| Final $R_i$ values (all data)               | 0.0311             | 0.1024             | 0.1367              |
| Final $wR(F^2)$ values (all data)           | 0.0462             | 0.2314             | 0.3228              |
